# Supplementary material for: Beyond extratropical cyclones: Large-scale control on atmospheric river landfall in the western United States
Source: Research Square preprint supplement (doi:10.21203/rs.3.rs-7068167/v1), 2025-09-23
Supplement: Supplementary file 1 [file 581a9fba651a418bc150908b.docx]

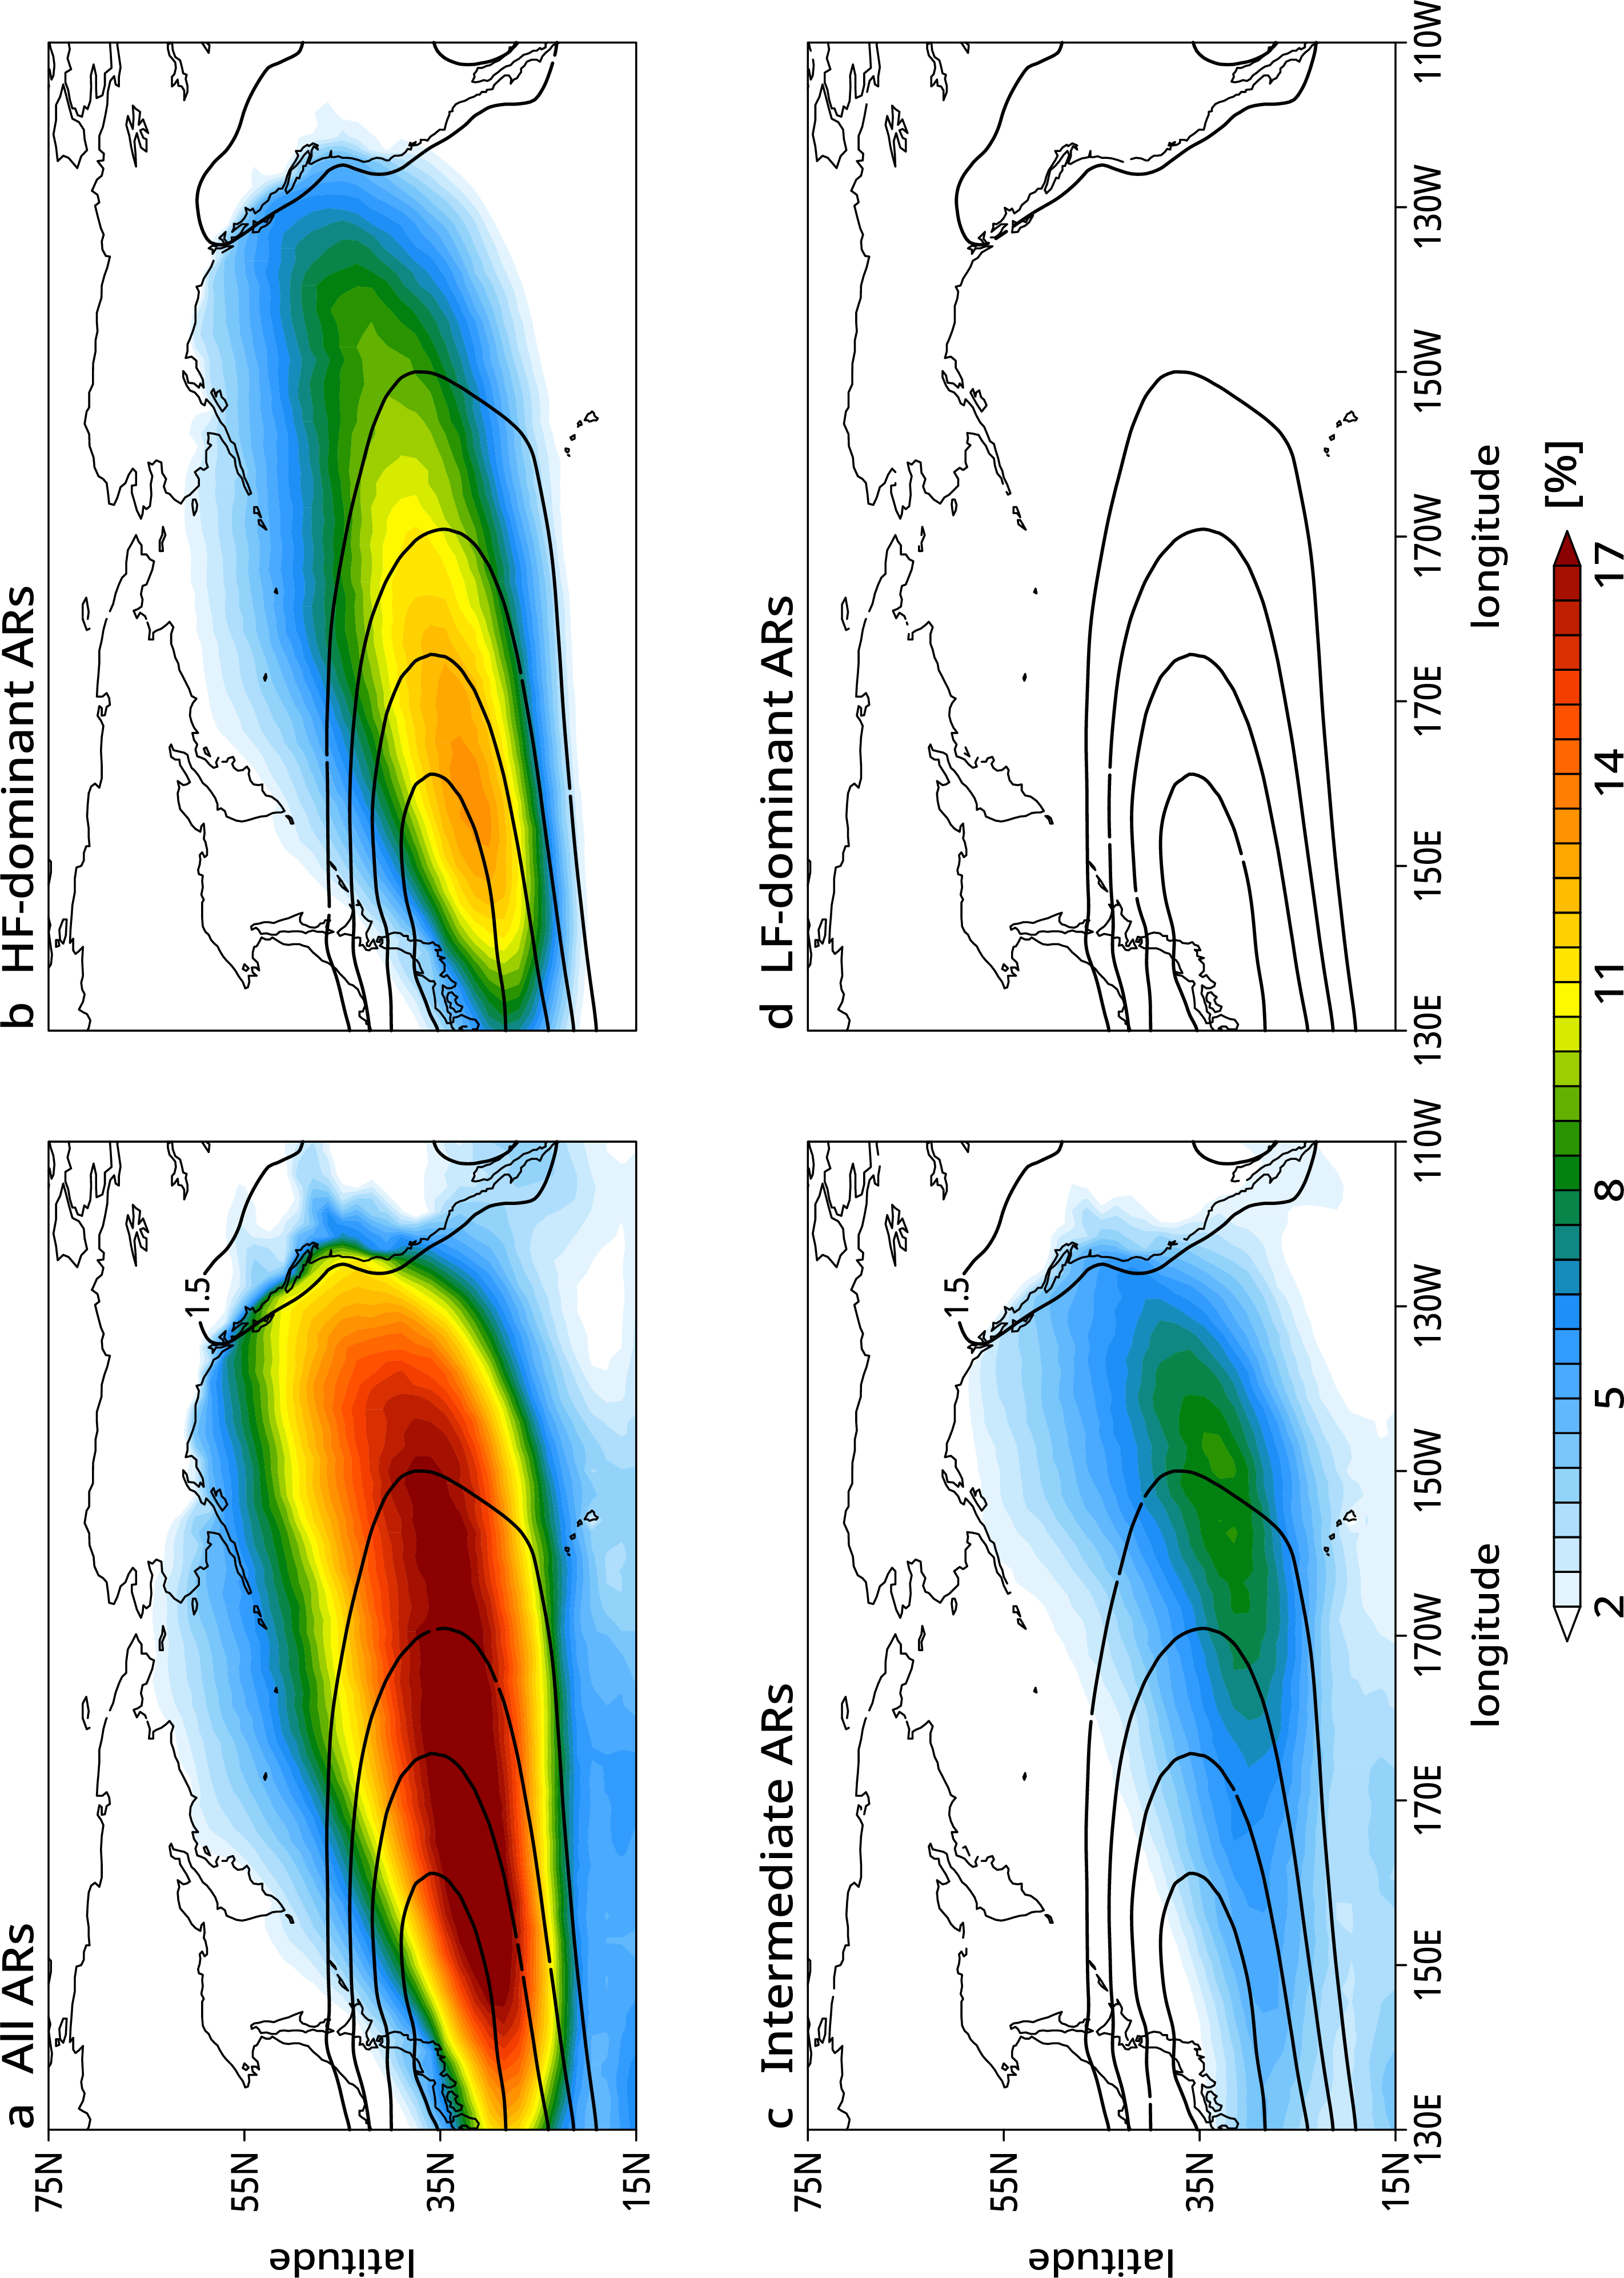


Fig. S1 | AR frequency and baroclinicity over the North Pacific

**(a)** AR frequency (shading, %) and baroclinicity (contoured in a 0.5 interval starting from 1.5; see Eq. 5 in Materials and Methods) over the North Pacific. **(b** to **d)** As in **(a)**, but for **(b)** HF-dominant ARs, **(c)** intermediate ARs, and **(d)** LF-dominant ARs.


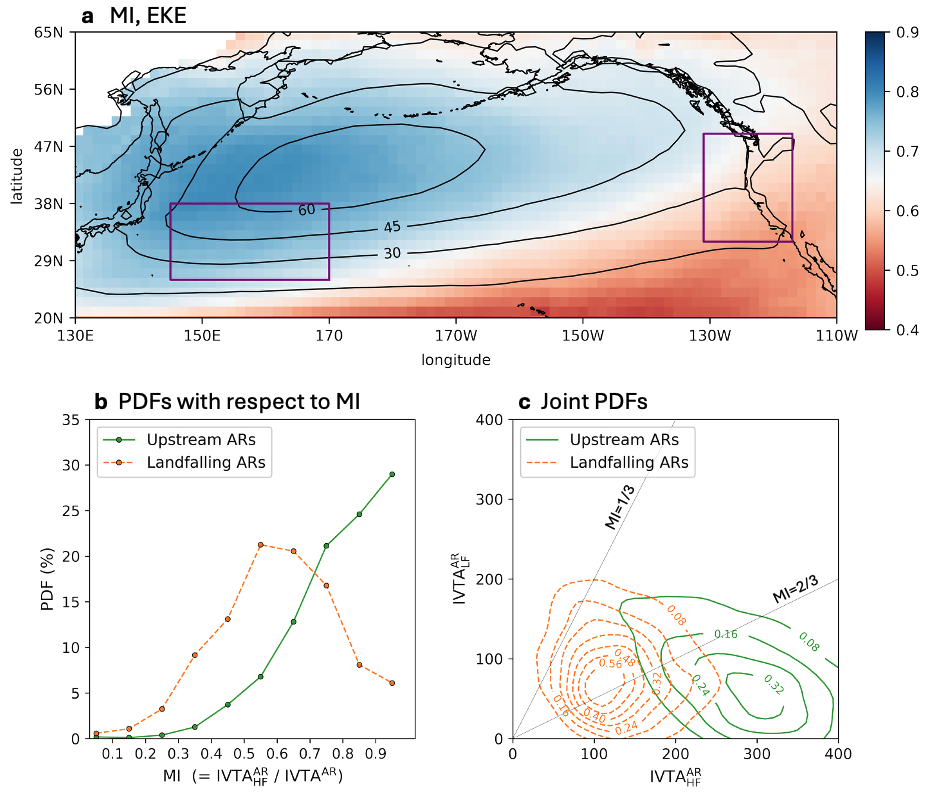


Fig. S2 | Contrasting nature of upstream versus downstream ARs over the North Pacific

As in Figure 1, but derived from the GW15 algorithm.





Fig. S3 | Sensitivity to different AR detection methods

As in Figure 1b, but derived from **(a)** different thresholds for AR detection with other requirements unchanged and **(b)** different AR catalogs participating in ARTMIP (see Materials and Methods for details). In **(b)**, only the common period of 2000–2019 is considered due to data availability.


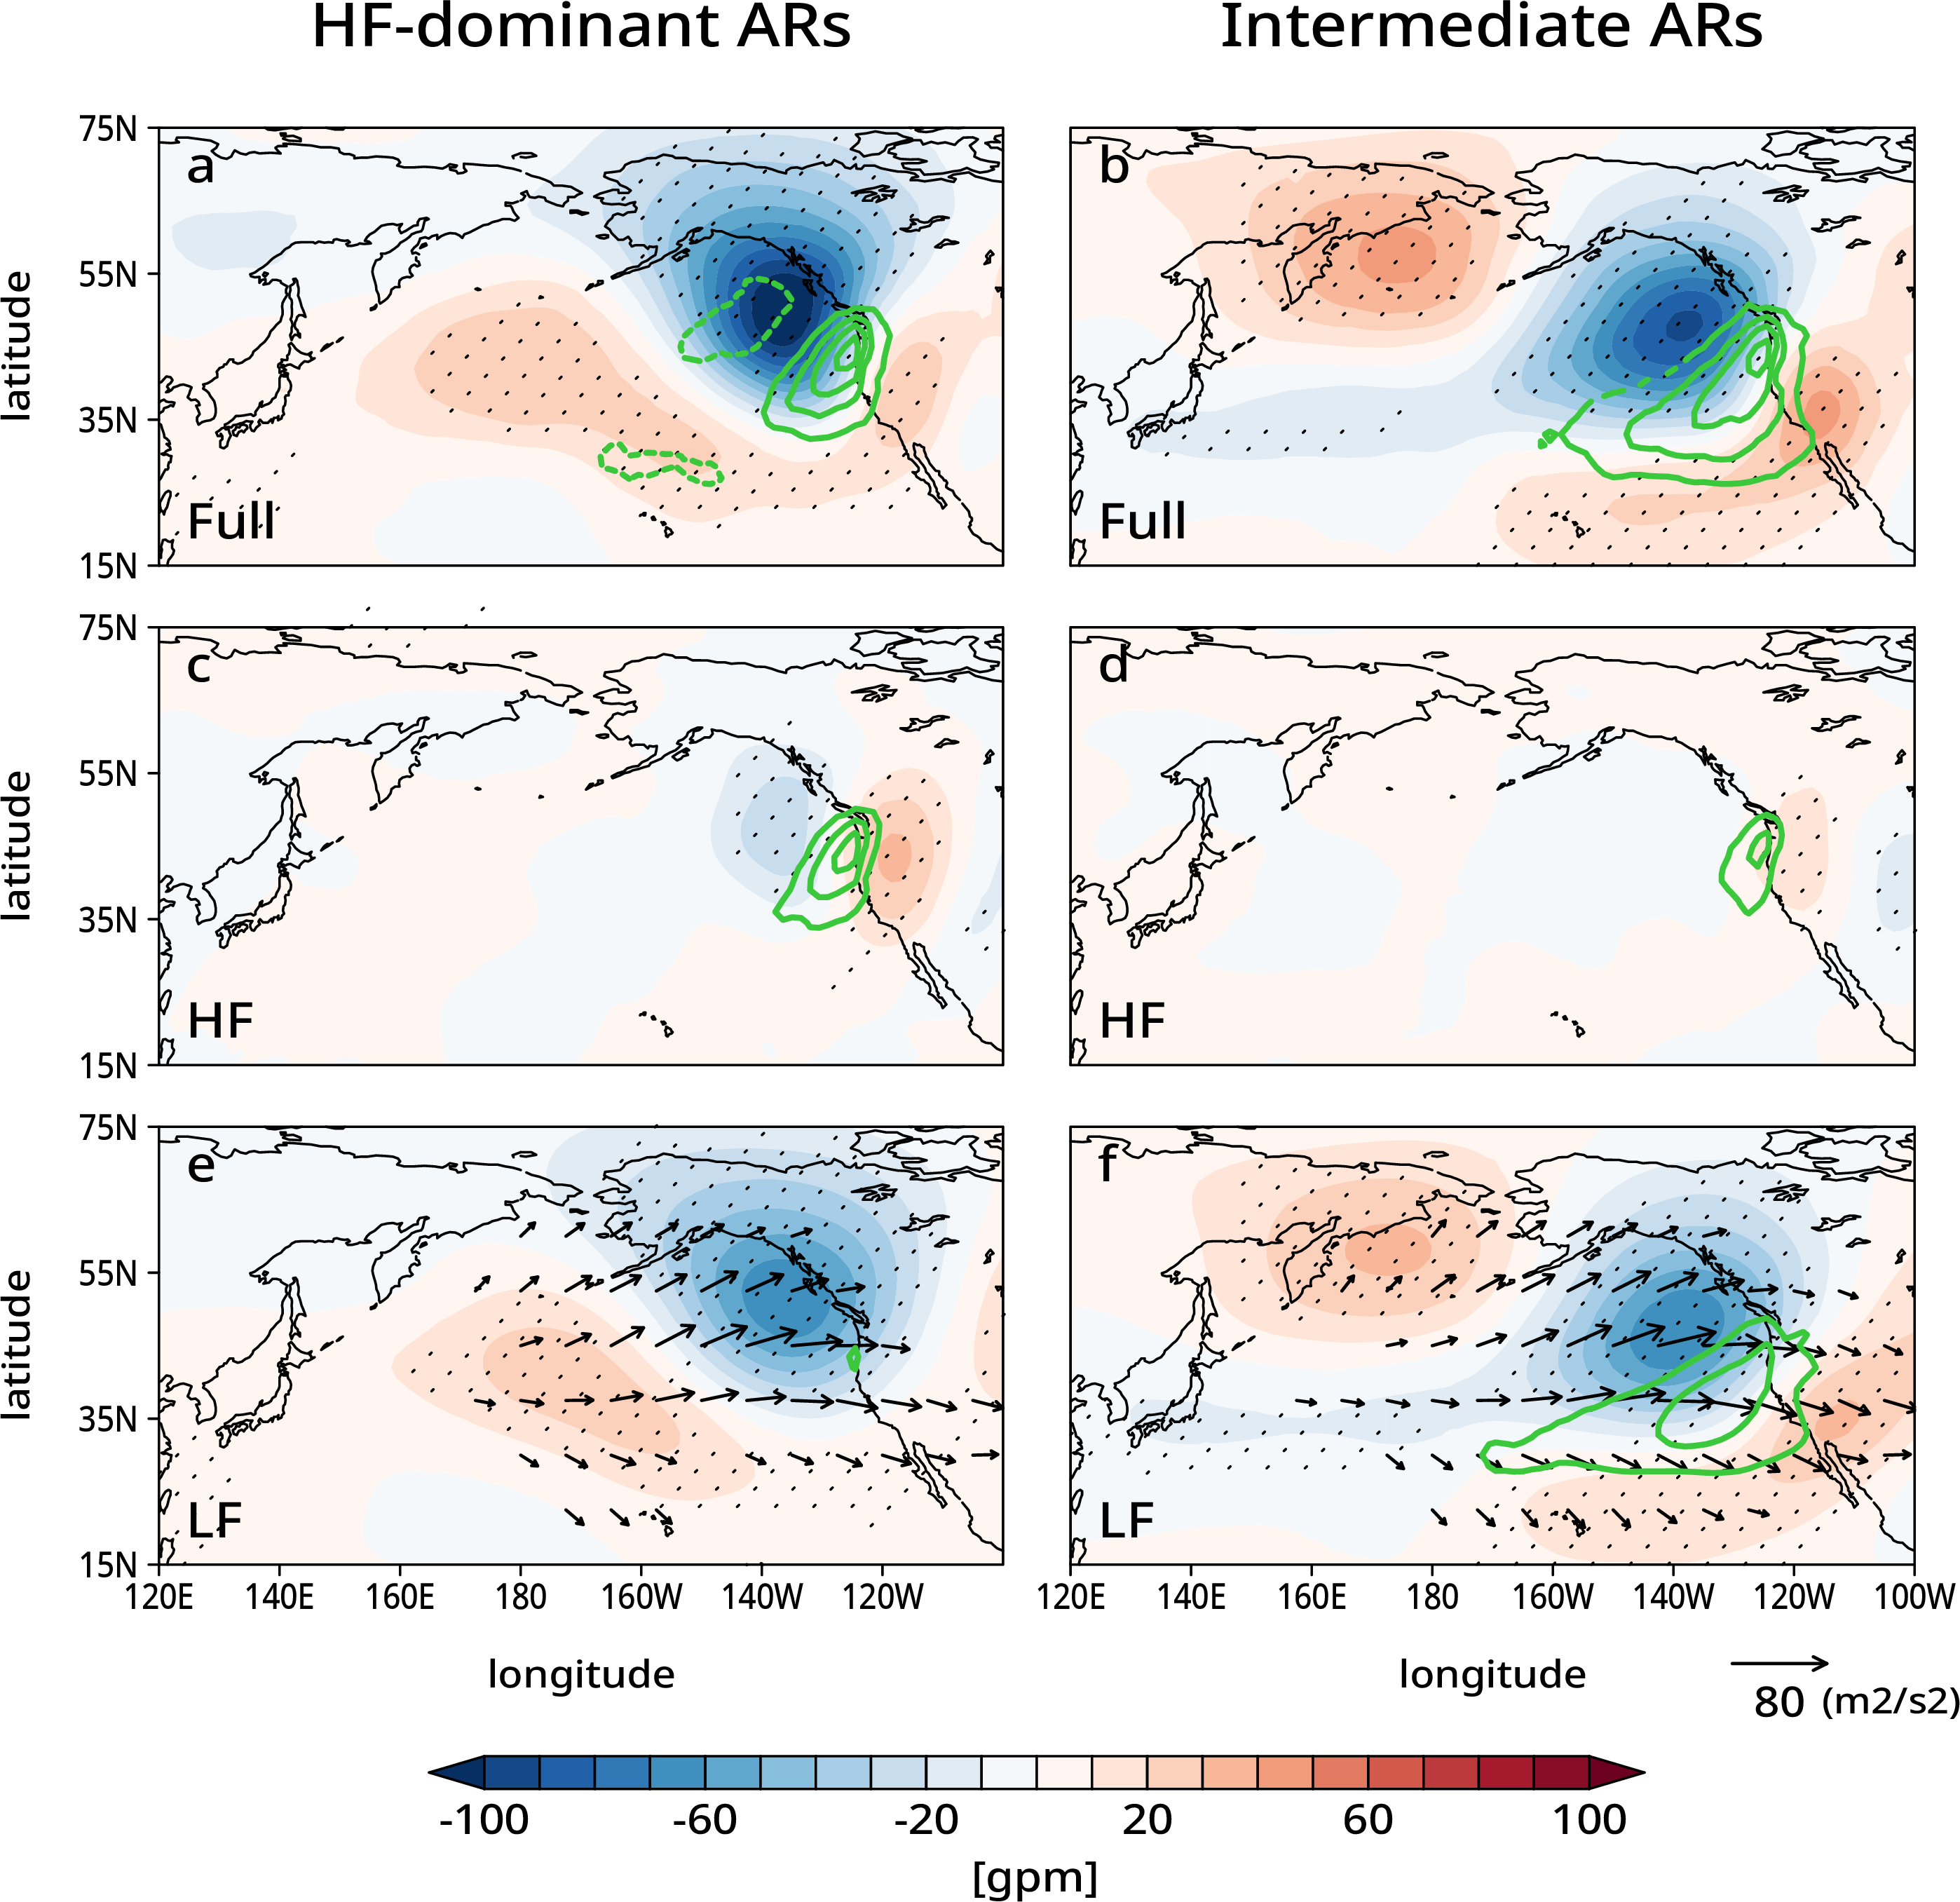


Fig. S4 | Synoptic and large-scale circulations of AR landfalls

As in Figure 2, but derived from the GW15 algorithm.


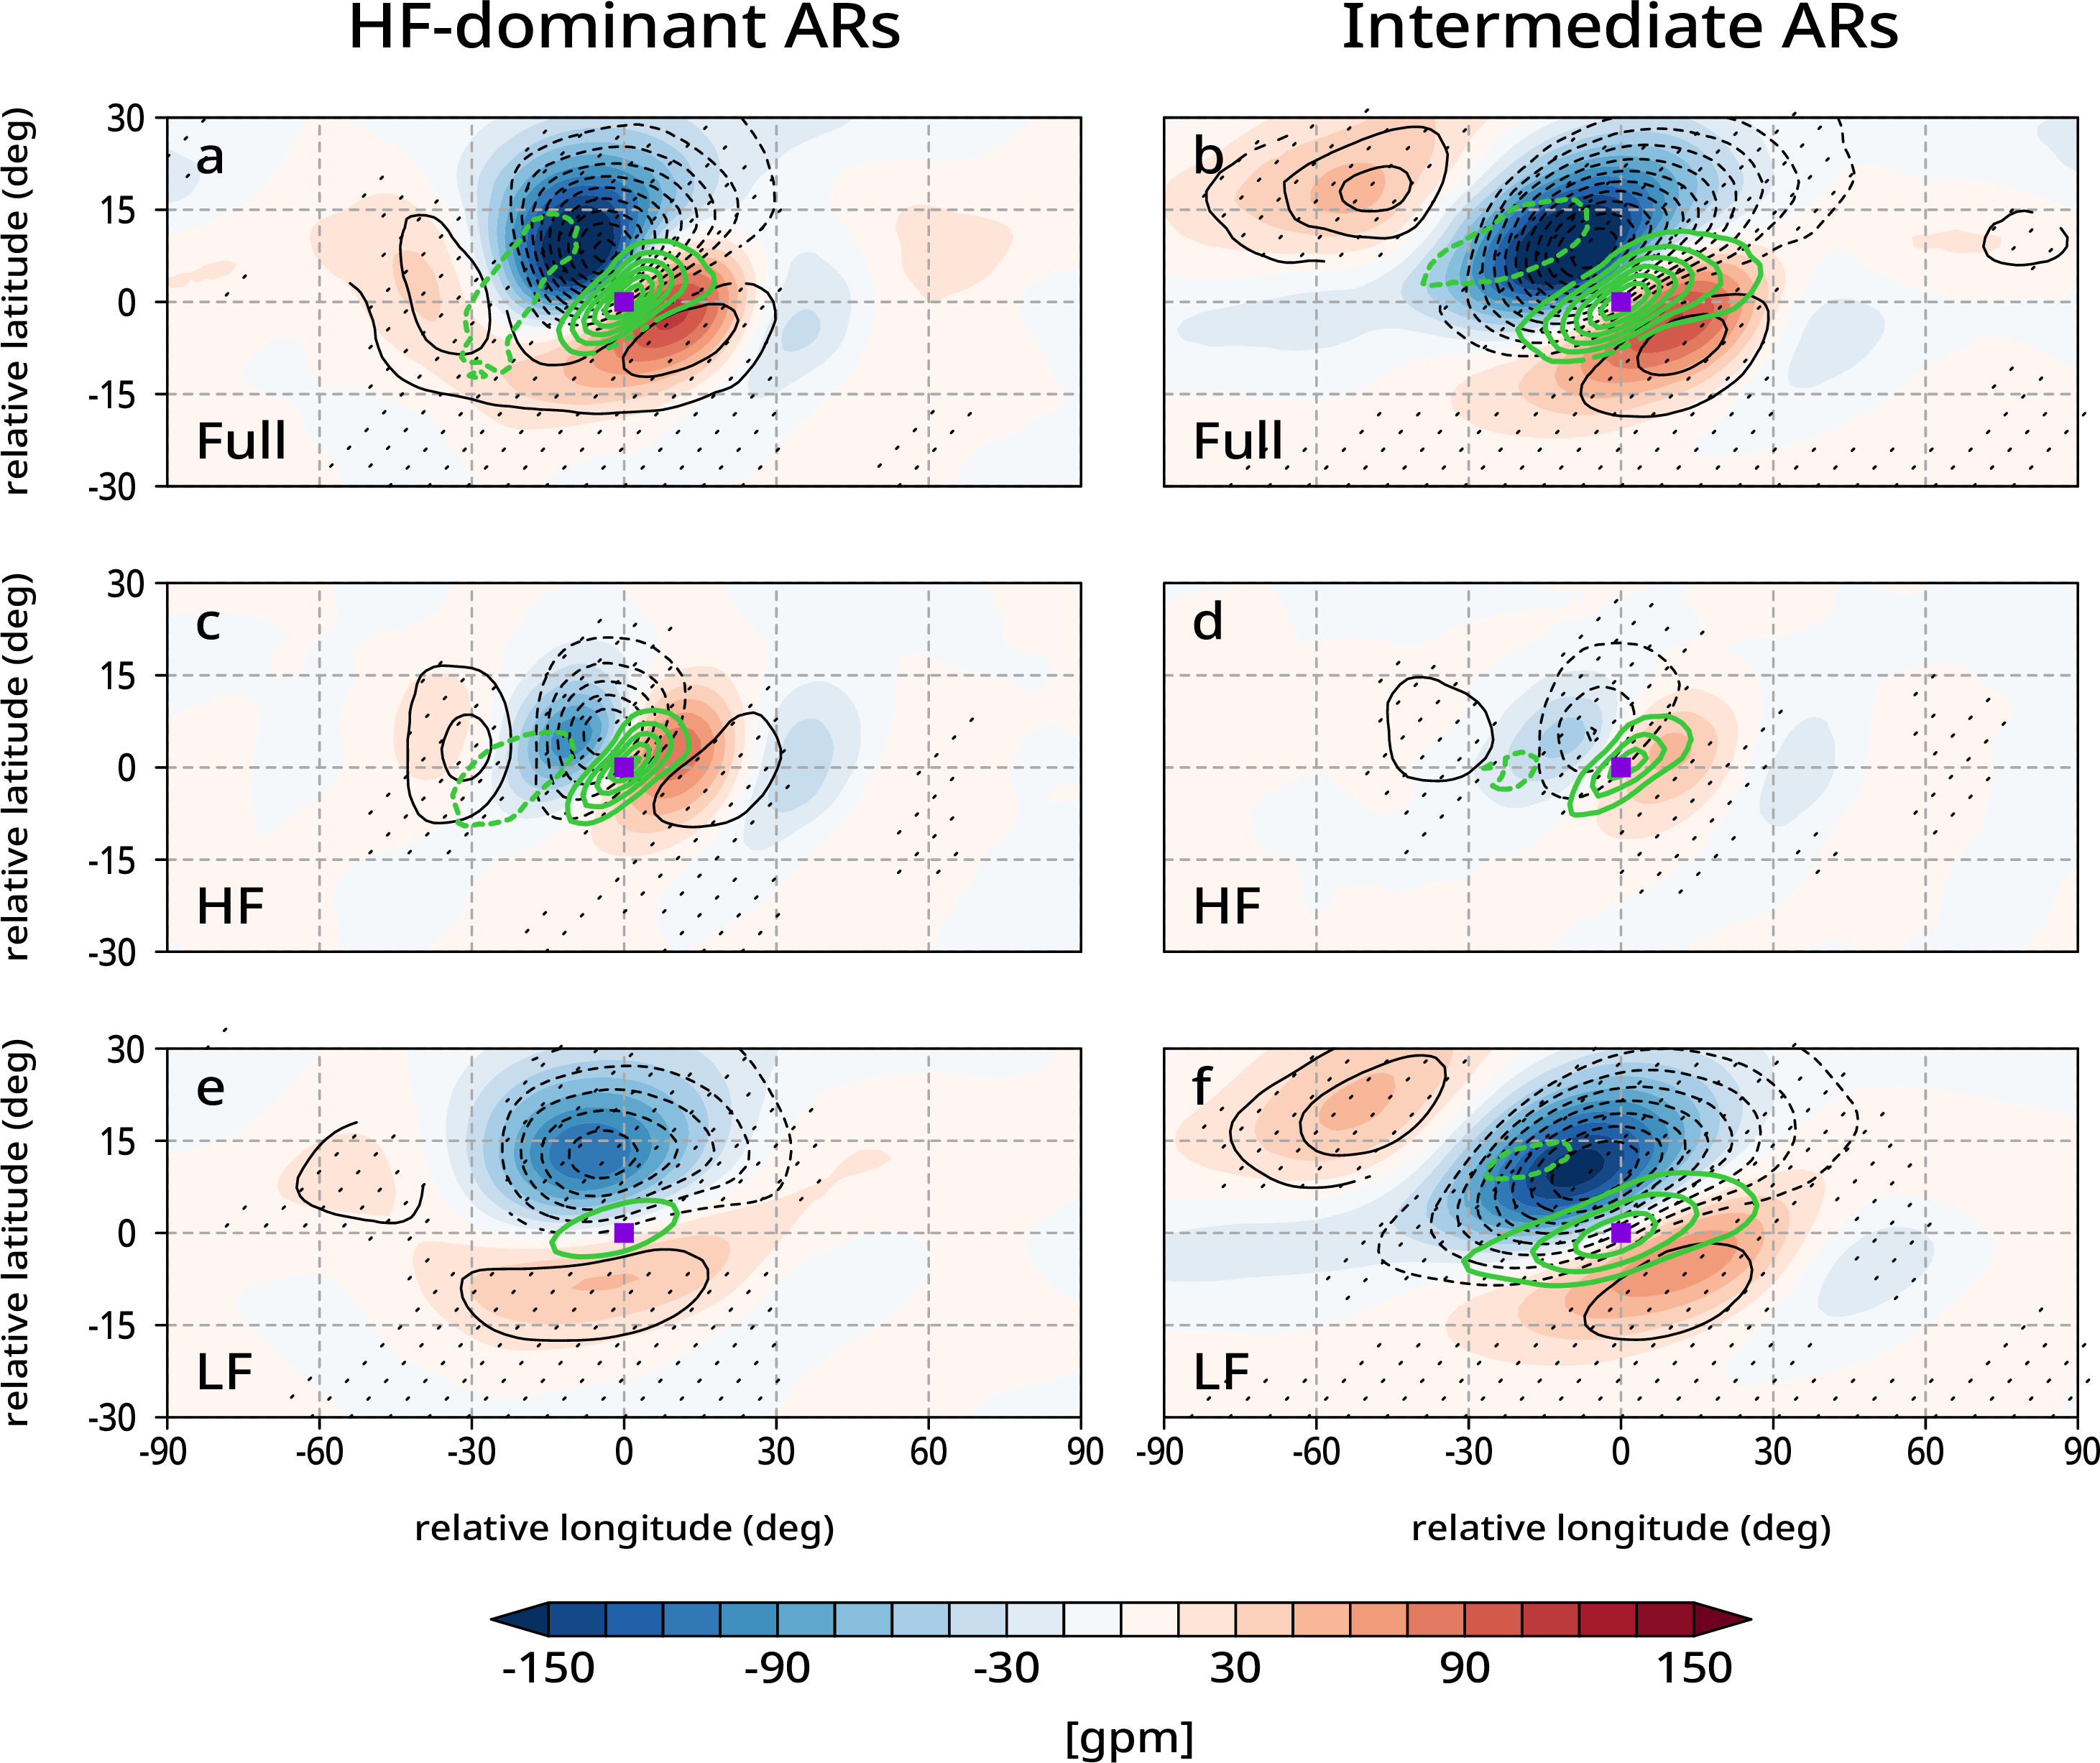


Fig. S5 | AR-relative composites of AR landfalls

AR-relative composites of **(a** and **b)** geopotential height anomalies at 300 hPa (shading, gpm), those at 850 hPa (contoured in black with a 10-gpm interval), and IVTA (contoured in green with a 50-kg m-1 s-1 interval), and their **(c** and **d)** HF and **(e** and **f**)LF components for (left) HF-dominant ARs and (right) intermediate ARs making landfall on the U.S. west coast. Only the first landfalling snapshot is considered for each landfall event. Only the statistically significant 850-hPa geopotential height anomaly and IVTA at the 95% confidence level are displayed. Stipples indicate the statistically significant 300-hPa geopotential height anomaly. The purple rectangle marks the location of the AR centroid.


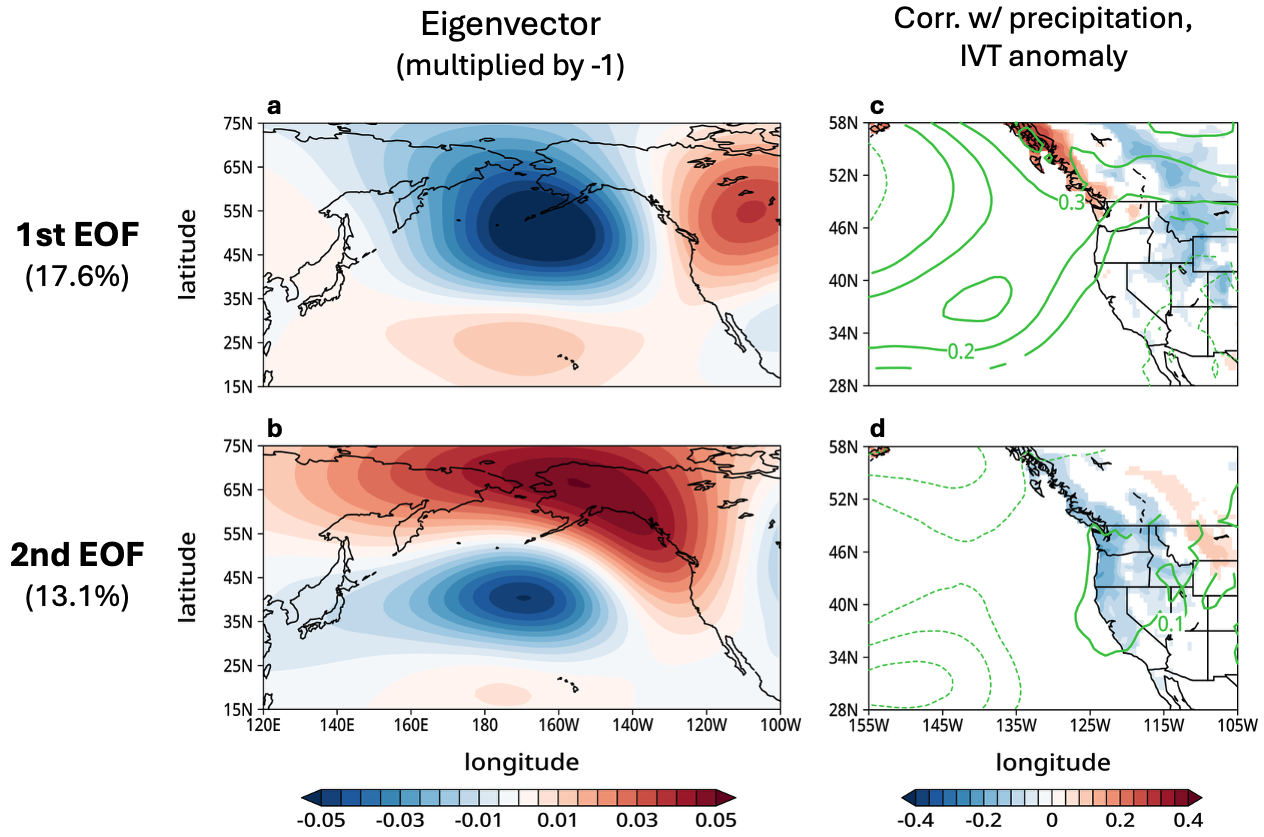


Fig. S6 | The first and second EOF modes

**(a** and **b)** As in Figure 3a, but for the **(a)** first and **(b)** second EOF modes. The eigenvectors are multiplied by -1 so that they align with the positive phases of PNA and NPO-like patterns, respectively. **(C** and **D)** As in Figure 3b, but for the **(c)** first and **(d)** second EOF modes.


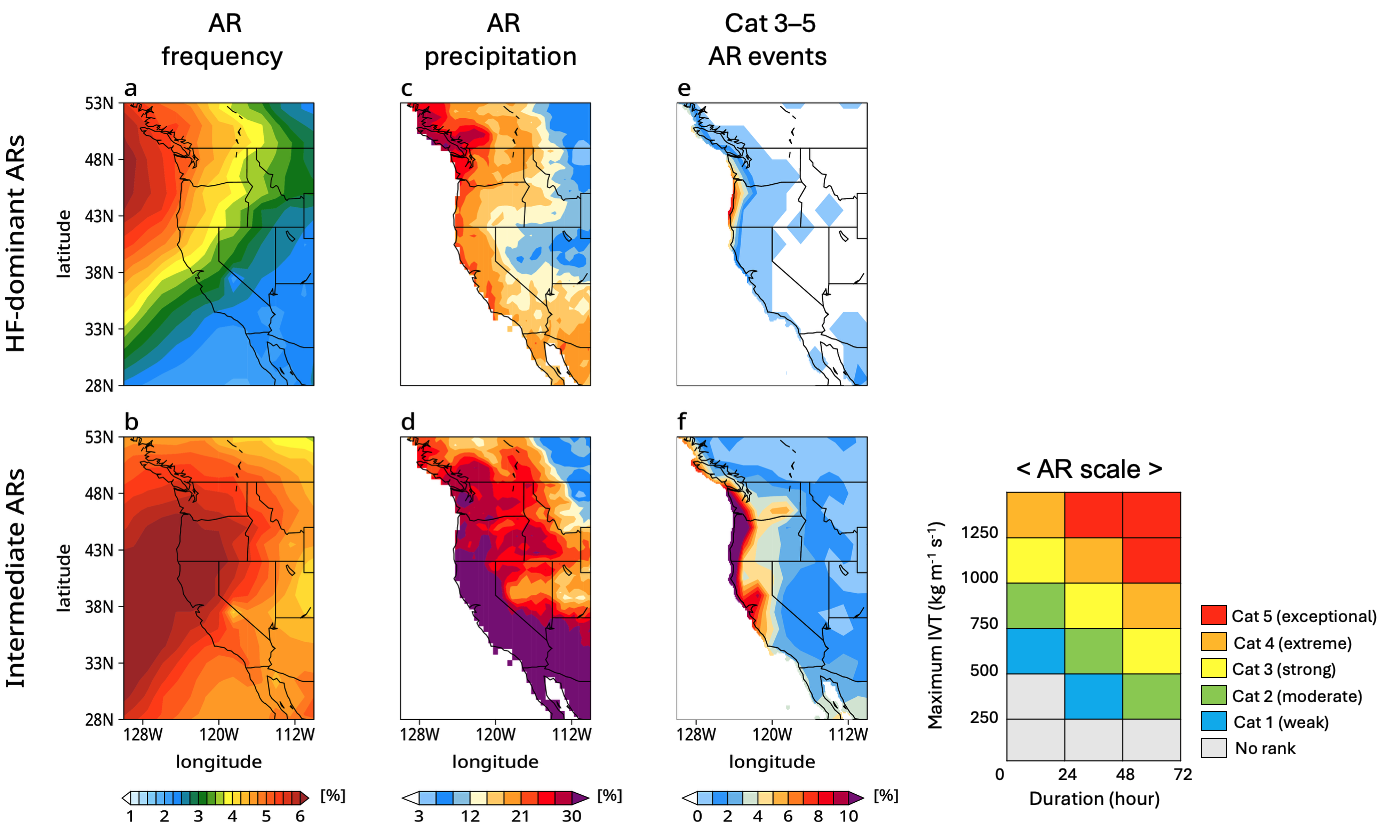


Fig. S7 | Hydrological impacts of HF-dominant versus intermediate ARs

As in Figure 4, but derived from the GW15 algorithm.


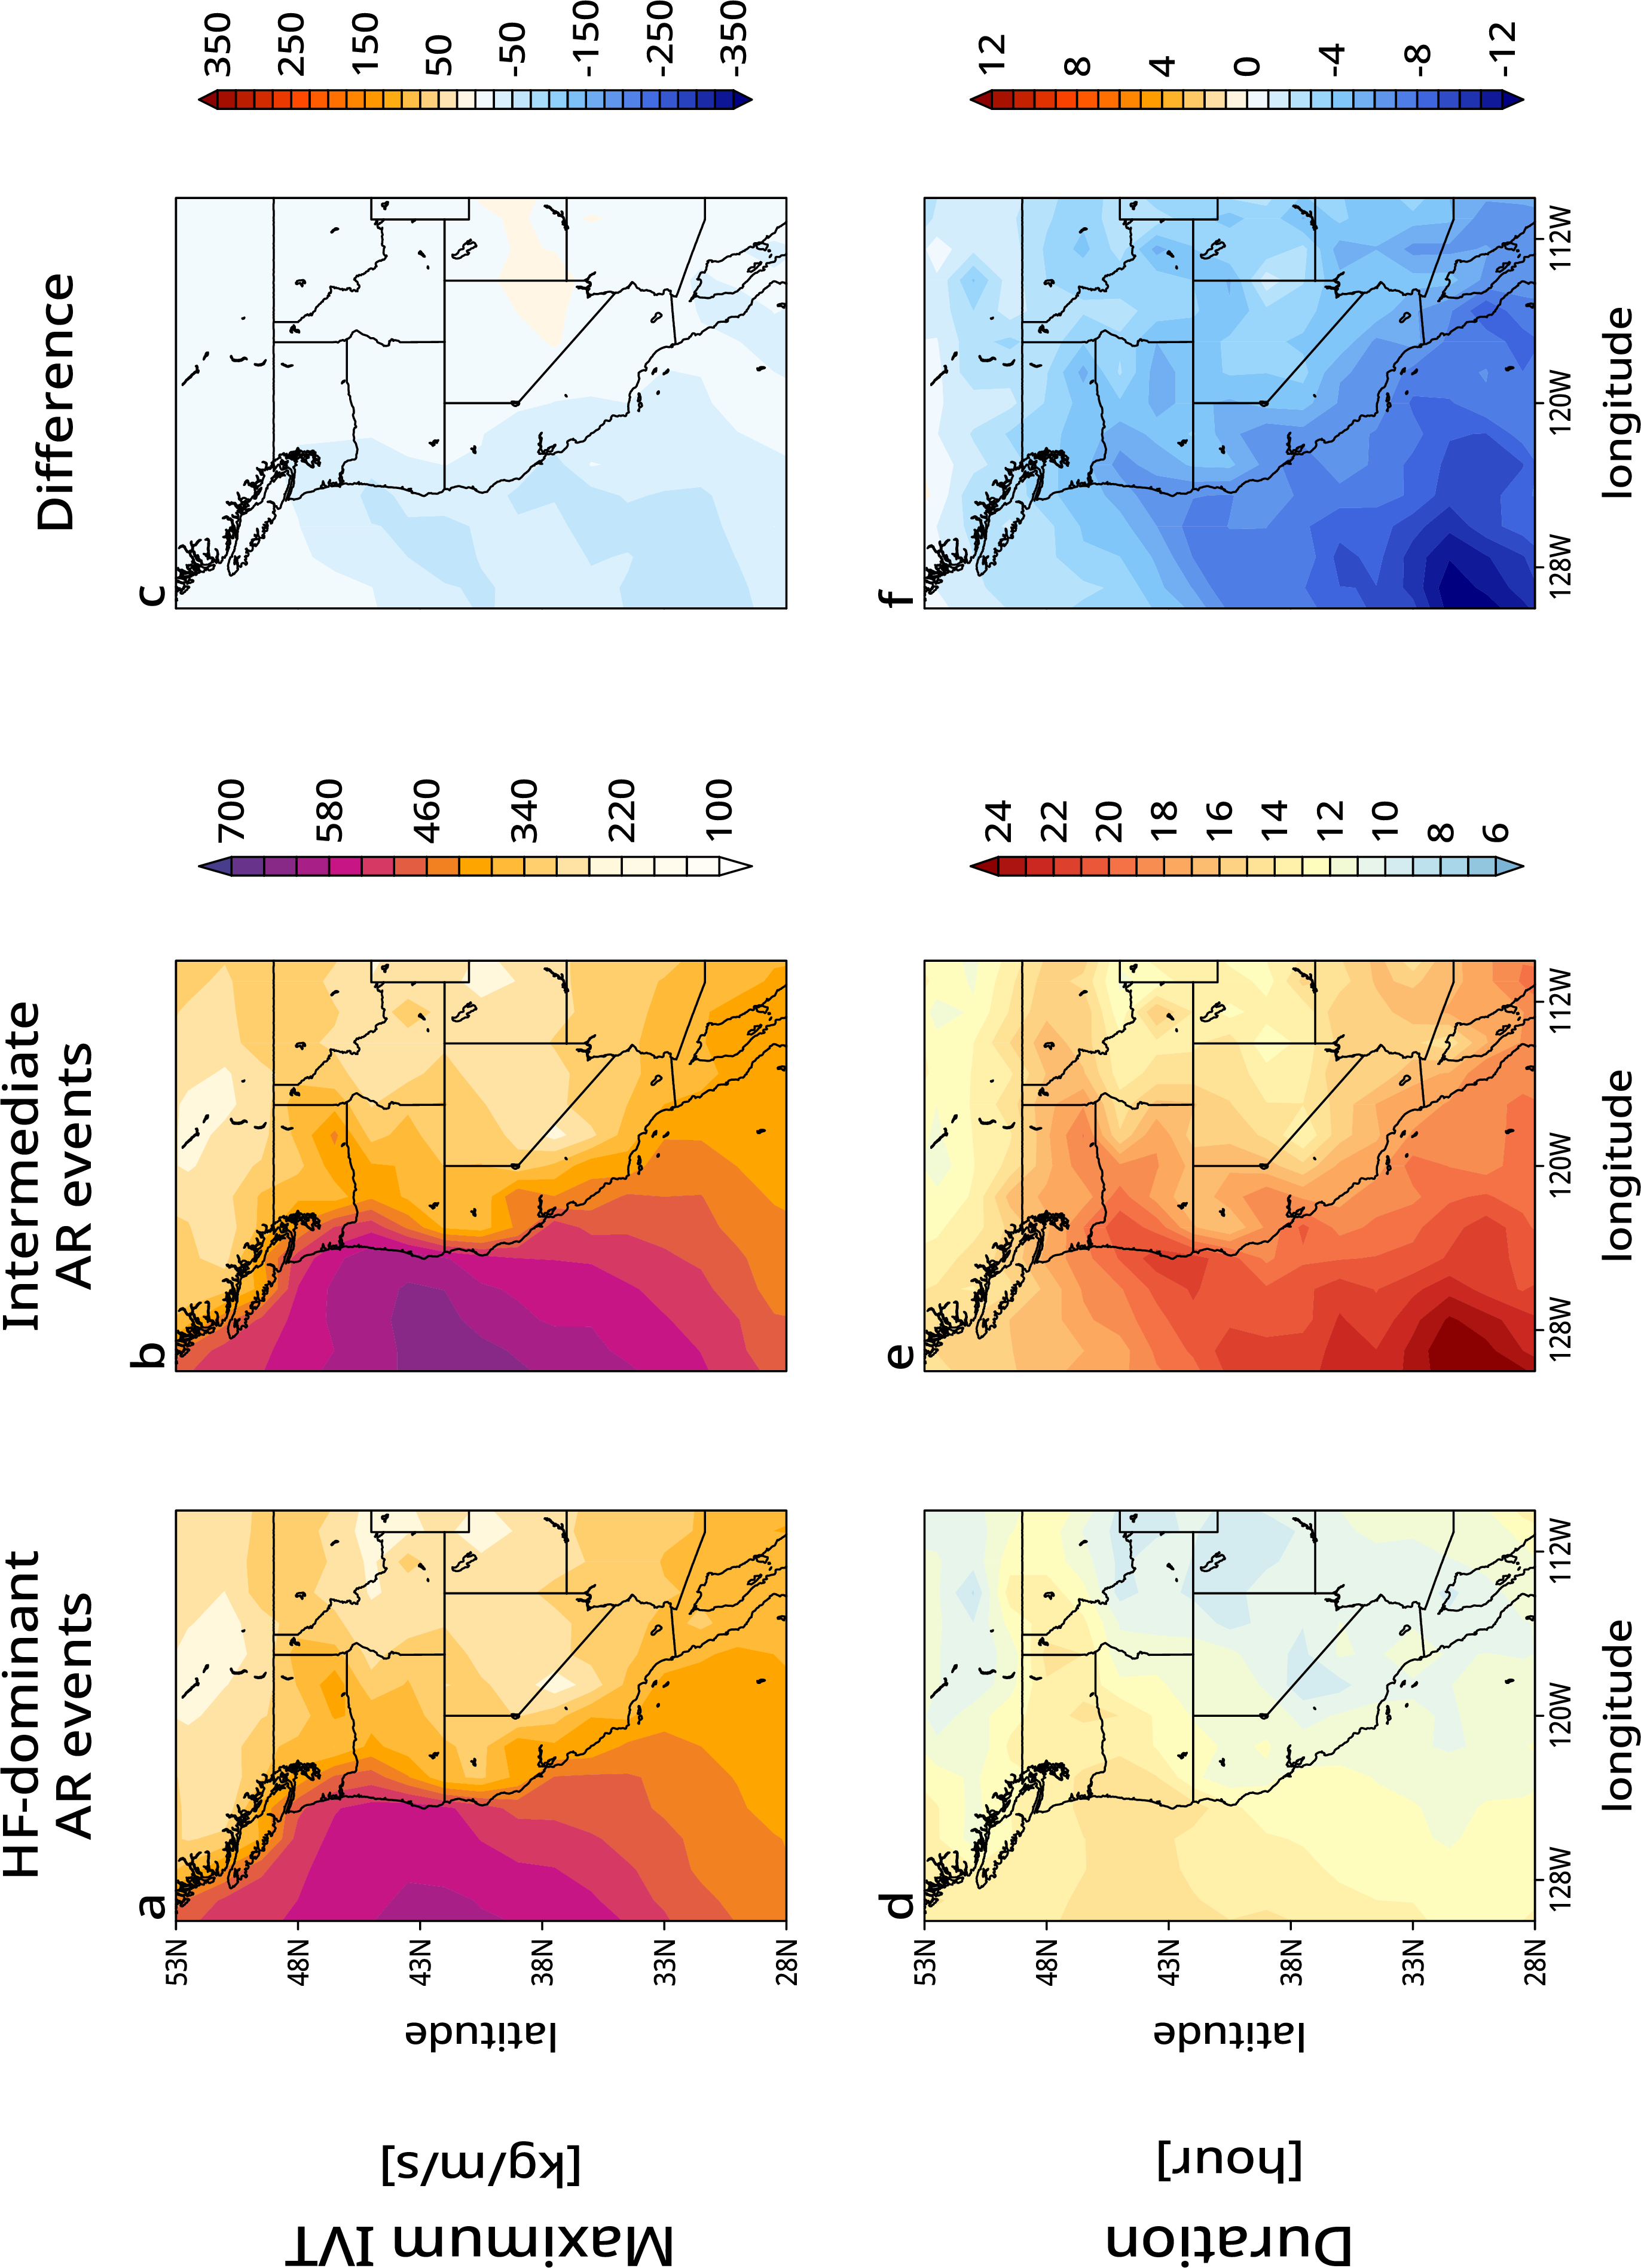


Fig. S8 | Maximum IVT and duration of AR events

Mean maximum IVT for **(a)** HF-dominant AR events and **(b)** intermediate AR events, and **(c)** their differences. **(d** to **f)** As in **(a** to **c)**, but for mean duration of AR events.


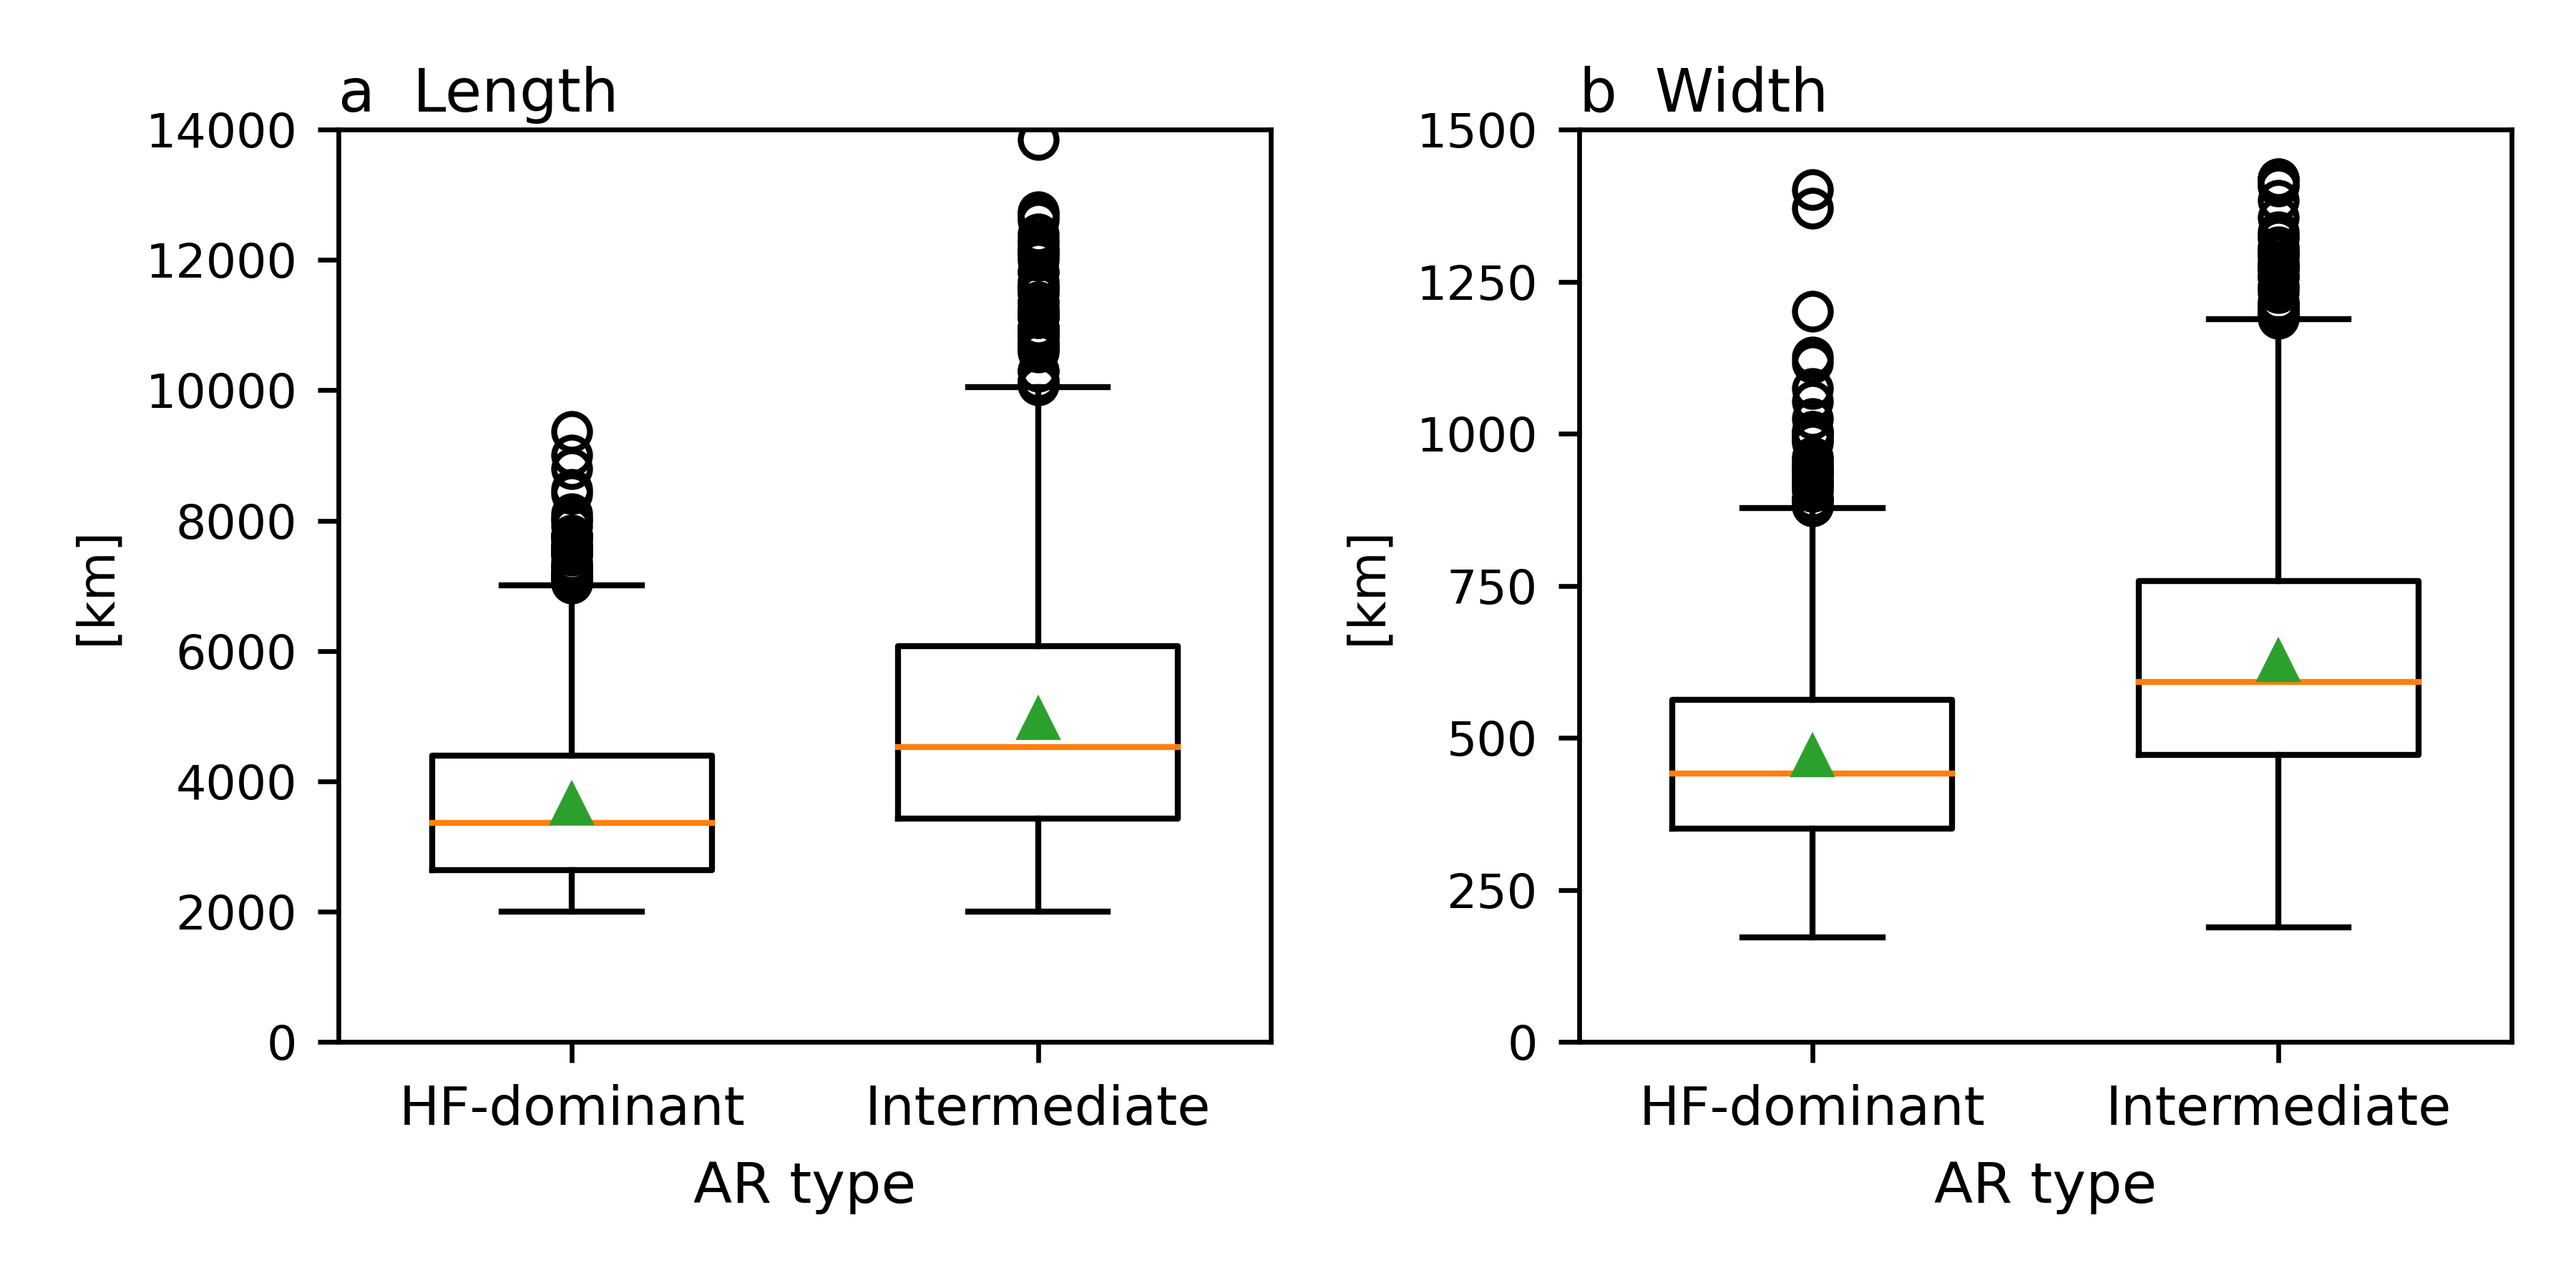


Fig. S9 | Size of landfalling ARs

Box-whisker plots of **(a)** length and **(b)** width of HF-dominant and intermediate ARs that make landfall on the U.S. west coast. The orange line and green triangle mark the median and mean, respectively.


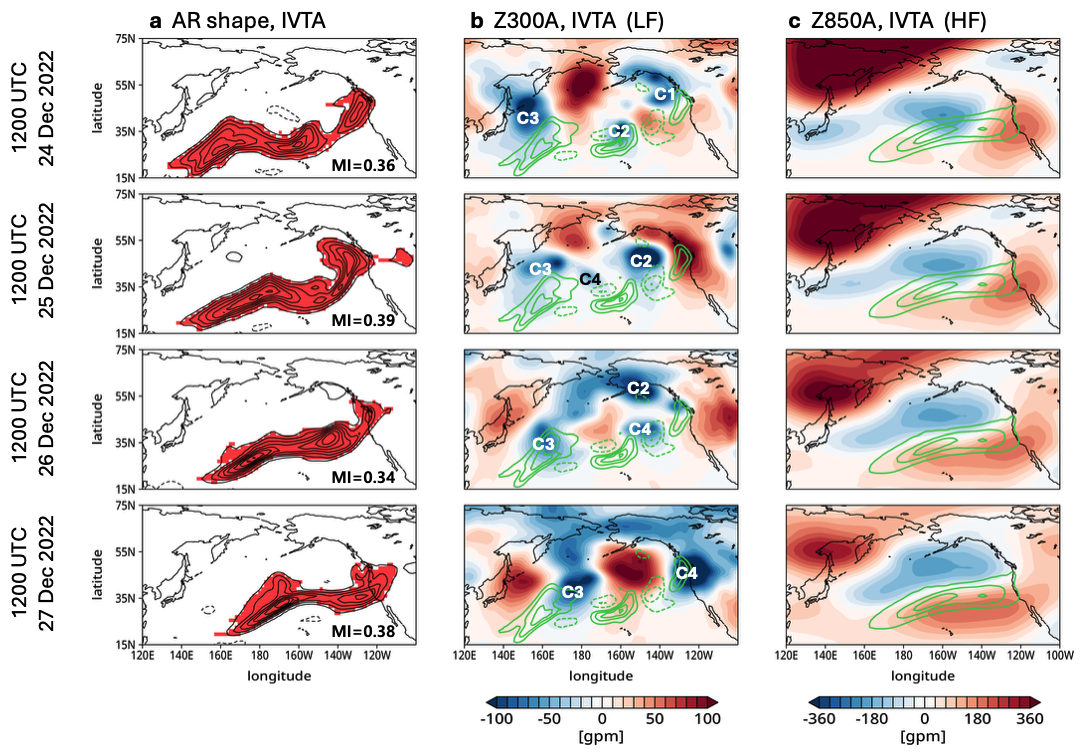


Fig. S10 | Daily evolution of HF and LF circulations during extreme AR landfall in late December 2022

**(a)** AR shape and IVTA (contoured in a 150-kg m-1 s-1 interval), **(b)** HF components of 850-hPa geopotential height anomaly (shading, gpm) and IVTA (contoured in a 150-kg m-1 s-1 interval), and **(c)** LF components of 300-hPa geopotential height anomaly (shading, gpm) and IVTA (contoured in a 150-kg m-1 s-1 interval), from 1200 UTC 24 to 1200 UTC 27 December 2022 in 24-hour interval. In **(a)**, MI values are represented at each time. In **(b)**, traveling extratropical cyclones are labeled with C1 to C4 in the order of their first occurrence.


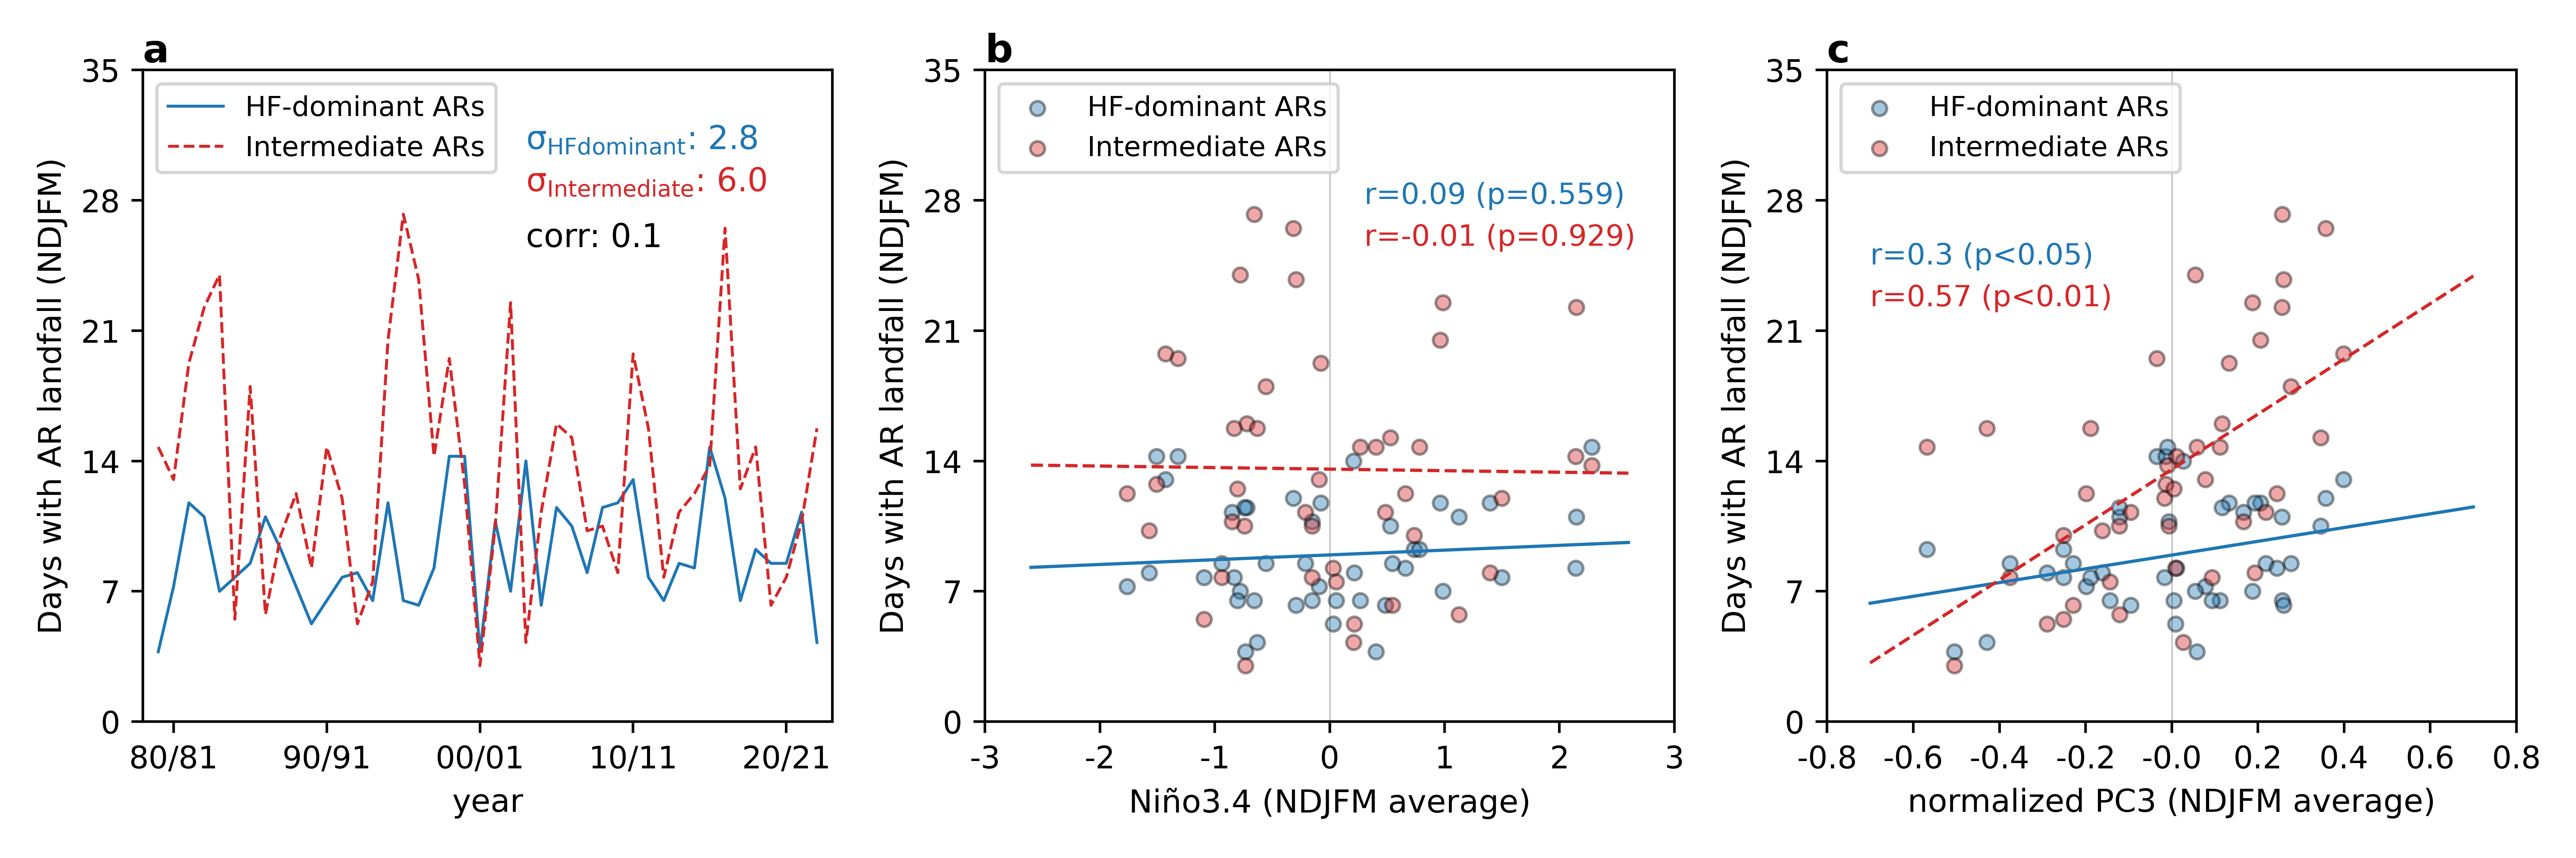


Fig. S11 | Interannual variability of AR landfalls

**(a)** Yearly time series of equivalent AR landfall days (i.e., the total number of 6-hourly landfalling AR snapshots divided by 4) for HF-dominant ARs (blue solid) and intermediate ARs (red dashed) during the cold season. Also printed are their standard deviations and linear correlation coefficient. **(b)** Scatter plots of AR landfall days and Niño 3.4 during the cold season for HF-dominant ARs (blue) and intermediate ARs (red). The linear best fits and linear correlation coefficients are also represented. **(c)** As in **(b)**, but against the seasonal-mean PC3.


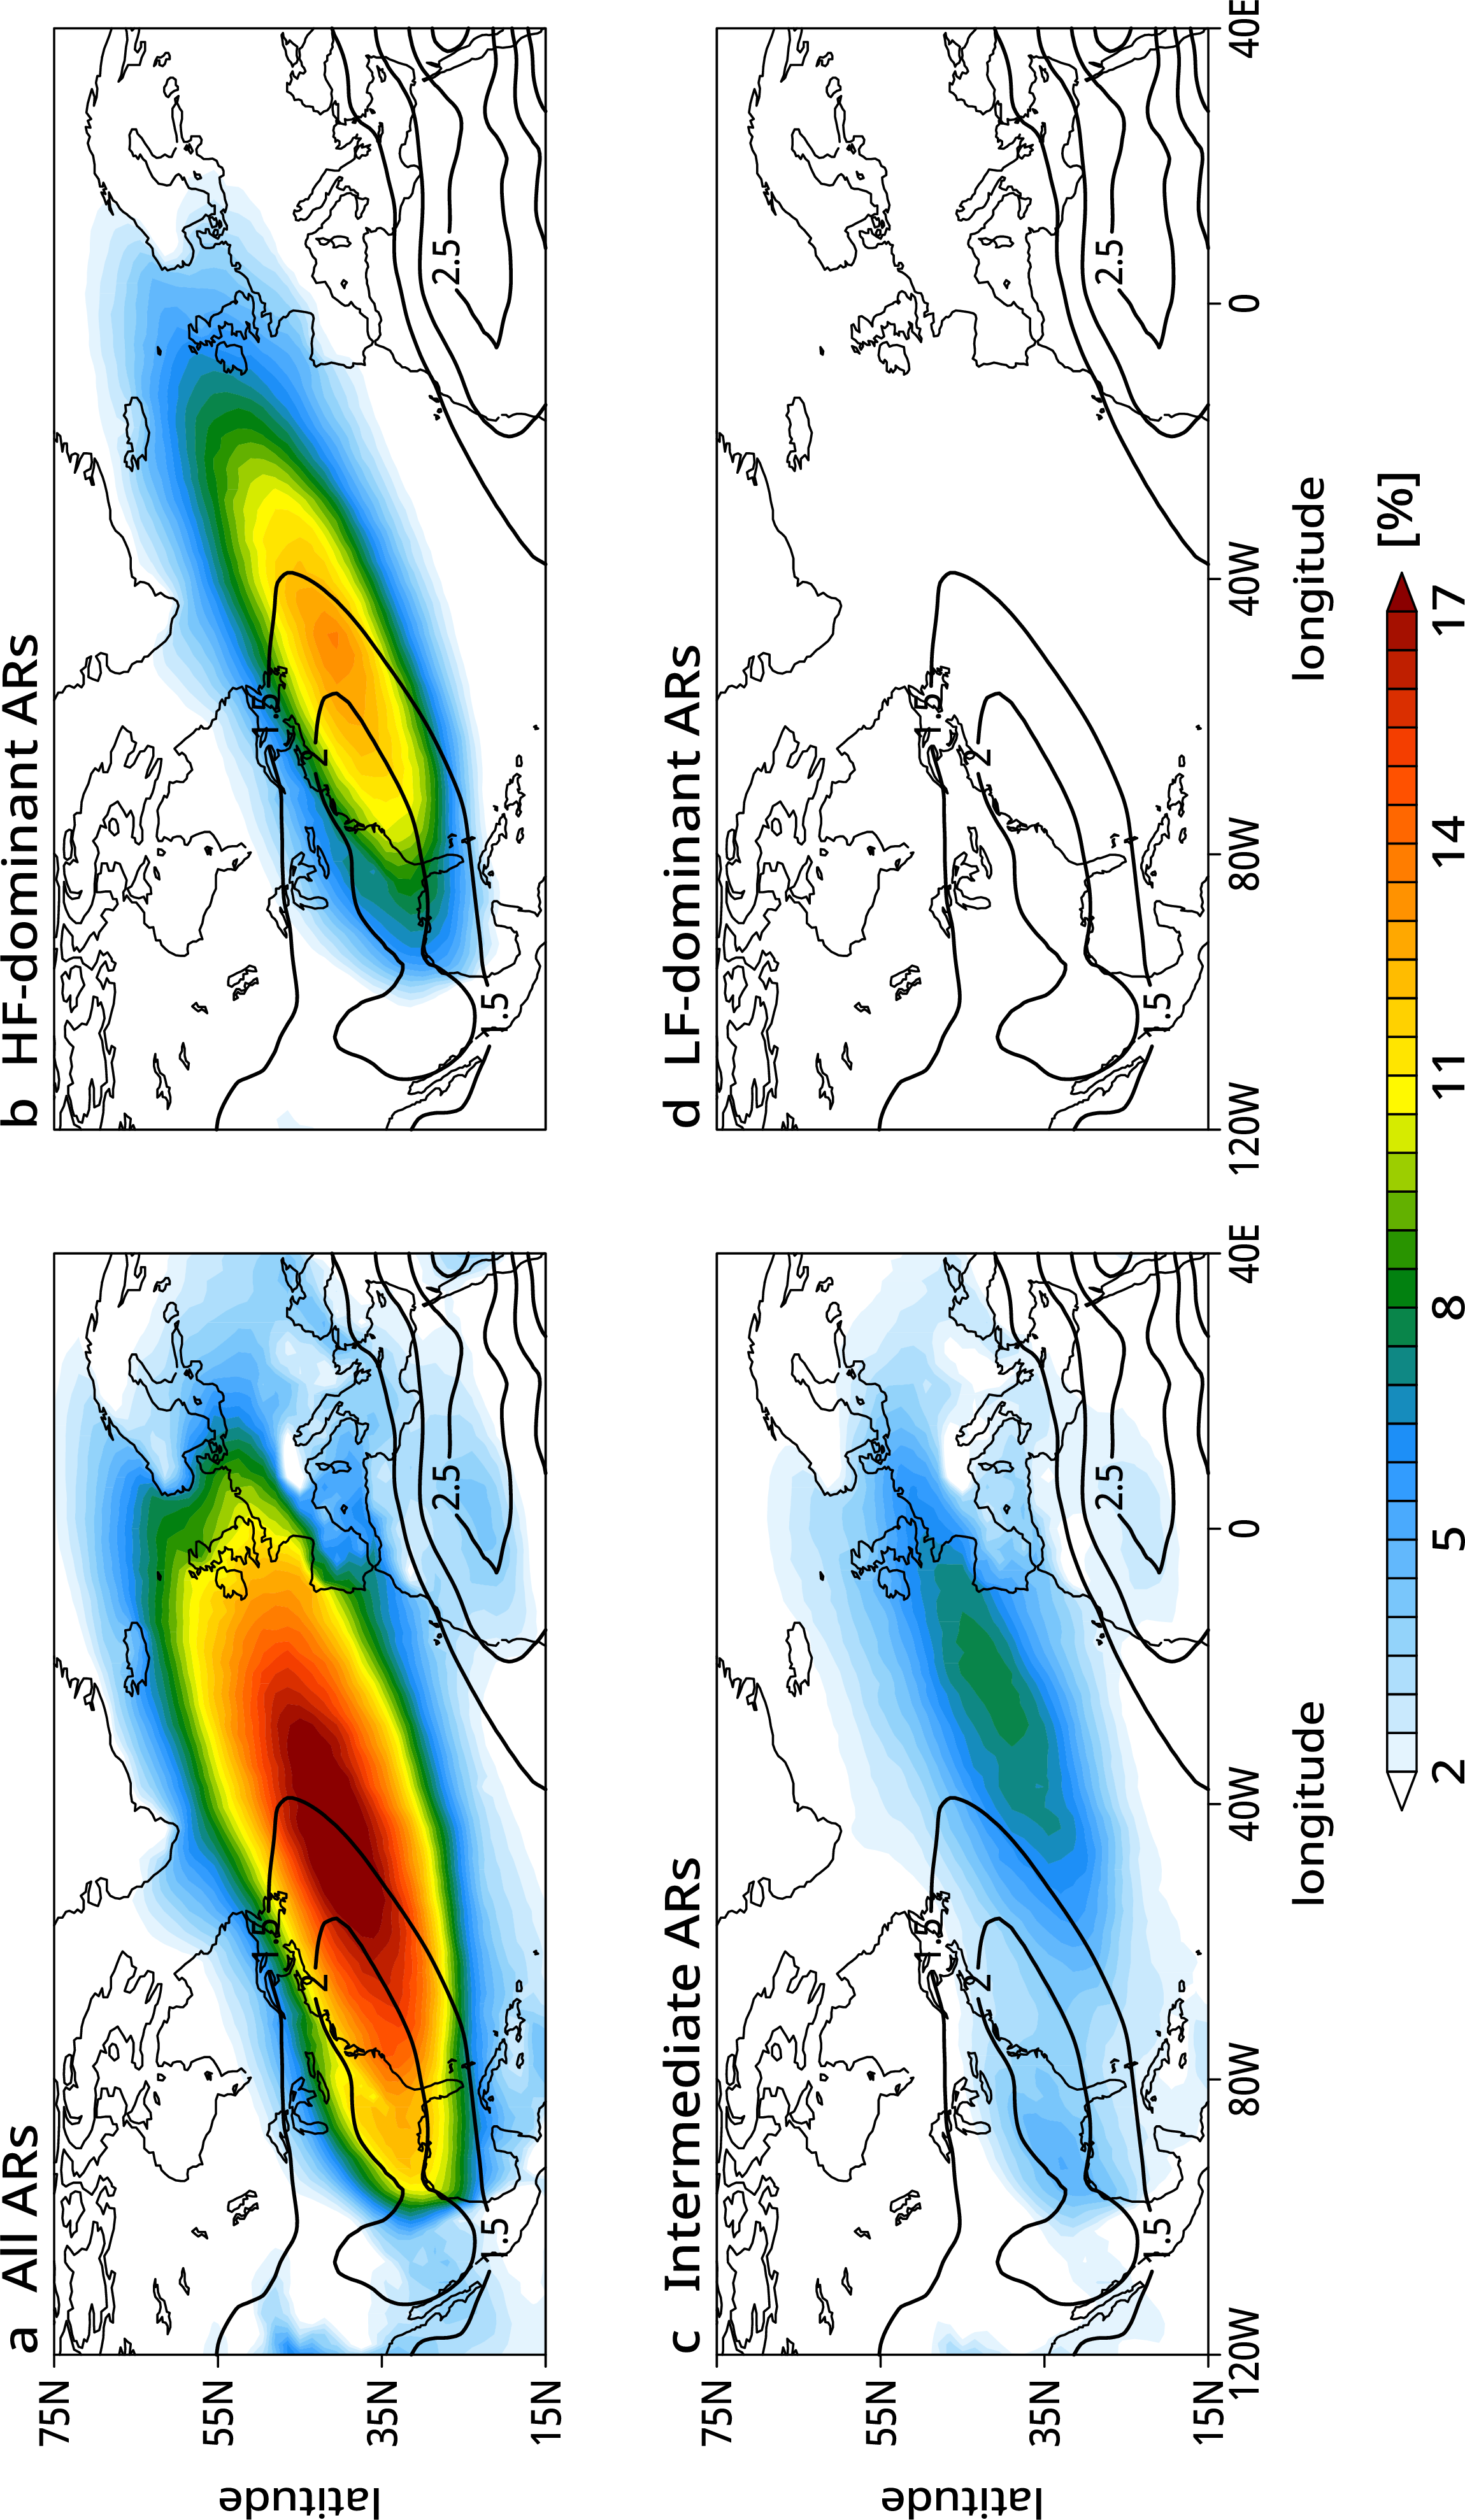


Fig. S12 | AR frequency and baroclinicity over the North Atlantic

As in Supplemental Figure S1, but over the North Atlantic.
