# Supplementary material for: Beyond extratropical cyclones: Large-scale control on atmospheric river landfall in the western United States
Source: Research Square preprint supplement (doi:10.21203/rs.3.rs-7068167/v1), 2025-09-23
Supplement: Supplementary file 2 [file fb65131f81a11b9eb47794fa.docx]

Video S1 | Temporal evolution of two landfalling AR types

As in Fig. 2, but for lagged composites (in a 6-hour interval) from -72 h to 0 h before ARs make landfall on the U.S. West Coast.
